# Supplementary material for: Oceanic spawning ecology of freshwater eels in the western North Pacific
Source: PubMed Central journal article supplement — Nat Commun. 2011 Feb 1;2:179. doi: 10.1038/ncomms1174 (PMC3105336; doi:10.1038/ncomms1174), 2011-02-01
Supplement: ncomms1174-s1.pdf [file ncomms1174-s1.pdf]

## SUPPLEMENTARY INFORMATION

### Oceanic spawning ecology of freshwater eels in the western North Pacific

Katsumi Tsukamoto<sup>1\*</sup>, Seinen Chow<sup>2</sup>, Tsuguo Otake<sup>3</sup>, Hiroaki Kurogi<sup>2</sup>, Noritaka Mochioka<sup>4</sup>  
Michael J. Miller<sup>1</sup>, Jun Aoyama<sup>1</sup>, Shingo Kimura<sup>5</sup>, Shun Watanabe<sup>1</sup>, Tatsuki Yoshinaga<sup>6</sup>  
Akira Shinoda<sup>1,7</sup>, Mari Kuroki<sup>1,8</sup>, Machiko Oya<sup>1</sup>, Tomowo Watanabe<sup>9</sup>, Kazuhiro Hata<sup>10</sup>  
Shigeho Ijiri<sup>11</sup>, Yukinori Kazeto<sup>12</sup>, Kazuharu Nomura<sup>13</sup>, Hideki Tanaka<sup>13</sup>

<sup>1</sup> Department of Marine Bioscience, Atmosphere and Ocean Research Institute, The University of Tokyo, Kashiwa, Chiba, 277-8564 Japan

<sup>2</sup> Coastal Fisheries and Aquaculture Division National Research Institute of Fisheries Science, Fisheries Research Agency, Yokosuka, Kanagawa, 238-0316 Japan

<sup>3</sup> International Coastal Research Center, Atmosphere and Ocean Research Institute, The University of Tokyo, Otsuchi, Iwate, 028-1102 Japan

<sup>4</sup> Bioresource Sciences, Faculty of Agriculture, Kyushu University, Fukuoka-City, Fukuoka, 812-8581 Japan

<sup>5</sup> Department of Natural Environment Studies/Department of Collaborative Research, Graduate School of Frontier Sciences/ Atmosphere and Ocean Research Institute, The University of Tokyo, Kashiwa, Chiba, 277-8564 Japan

<sup>6</sup> Department of Marine Bioscience, School of Marine Biosciences, Kitasato University, Ofunato, Iwate, 022-0101 Japan

<sup>7</sup> Department of Biology, Tokyo Medical University, Shinjuku, Tokyo, 160-8402 Japan

<sup>8</sup> The Department of Research, The University Museum, The University of Tokyo, Hongo, Bunkyo, Tokyo, 113-0033 Japan

<sup>9</sup> Marine Environmental Data Integrated Analysis Center, National Research Institute of Fisheries Science, Fisheries Research Agency, Yokohama, Kanagawa, 236-8648 Japan

<sup>10</sup> Training and Education Center, National Fisheries University, Shimonoseki, Yamaguchi, 759-6595 Japan

<sup>11</sup> Division of Marine Life Science, Graduate School of Fisheries Sciences, Hokkaido University, Hakodate, Hokkaido, 041-8611 Japan

<sup>12</sup> Aquaculture Biology Division, Tamaki Station, National Research Institute of Aquaculture, Fisheries Research Agency, Tamaki, Mie 519-0423 Japan

<sup>13</sup> Aquaculture Biology Division, National Research Institute of Aquaculture, Fisheries Research Agency, Minami-Ise, Mie 516-0193 Japan

\*To whom correspondence should be addressed. E-mail: [ktpc@aori.u-tokyo.ac.jp](mailto:ktpc@aori.u-tokyo.ac.jp)

## Supplementary Figures

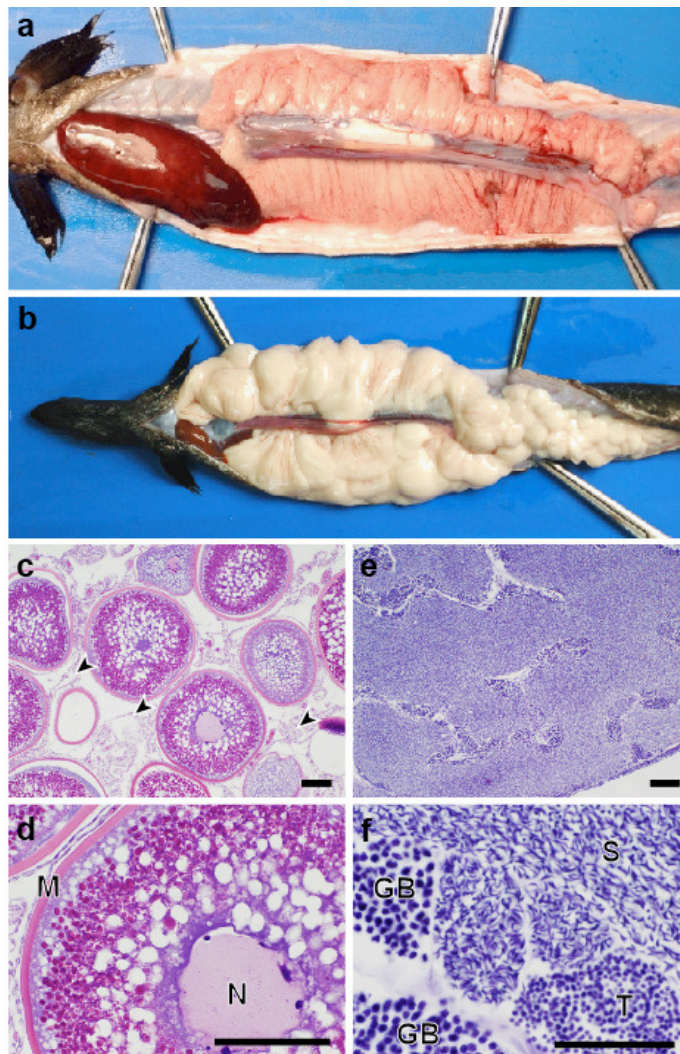

**Supplementary Figure S1. Eel gonadal morphology and histology.** (a) Female *Anguilla japonica* (739 mm, 330 g) collected in June 2009 with gonads in a post-spawning state. (b) Male *A. japonica* (447 mm, 129 g) collected in June 2009 (shown in Fig. 1b). (c) Histological section of the ovary of the female *Anguilla japonica* in (a). Many post-ovulated follicles (arrowheads) were observed in the ovary, suggesting that this eel had already spawned, but secondary batches of oocytes were developing. Oocyte diameter ranged from 300–600  $\mu\text{m}$  with a mode of 500  $\mu\text{m}$ . (d) Mid-vitellogenic stage oocyte with a large nucleus (N) and distinct egg membrane (M), within the same ovary in (a) and (c). (e) Testis of the male *A. japonica* in (b) and Fig. 1b. (f) Sperm (S), spermatatids (T) and late type B spermatogonia (GB) in an enlarged photograph of (e). The spermatic duct was filled with sperm in the testis. Scale bars are 100  $\mu\text{m}$  for (c), (d), (e), and 40  $\mu\text{m}$  for (f).

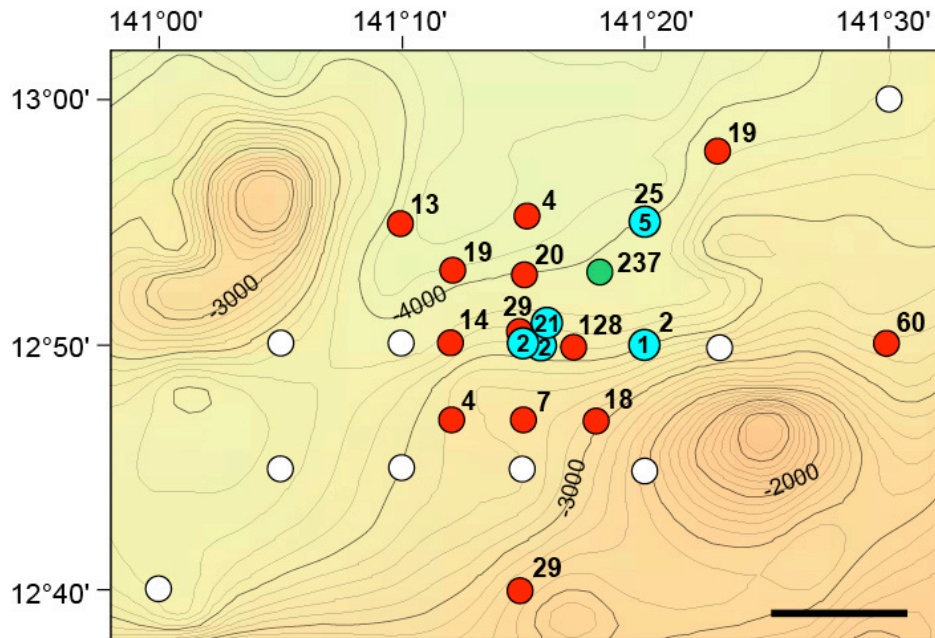

**Supplementary Figure S2. Egg and preleptocephalus catches in the egg grid.** The collection locations of Japanese eel, *Anguilla japonica*, eggs (light blue circles) and preleptocephali (red and green circles) in the grid of 25 stations at the southern part of the West Mariana Ridge in the western North Pacific where the intensive survey for eggs and preleptocephali was made during 22–25 May 2009. The numbers of eggs collected in each tow at 3 stations (3 tows were made at the first station) are shown in circles, and the numbers of preleptocephali at each station to the upper-right of each symbol. White circles show stations with no eggs or larvae. The green circle shows the location where the depth distribution study of newly hatched preleptocephali and CTD observation were conducted (see Fig. 6). Scale bar is 10 km.

**Supplementary Table S1. Fishing effort and catches of eel stages in relation to new moon.**

| Ship/Sampling survey   | Stage    | Year | Sampling dates | Date of new moon | Number of tows | No. of Positive tows | Number collected | Species/sex         | Dates of collection |
|------------------------|----------|------|----------------|------------------|----------------|----------------------|------------------|---------------------|---------------------|
| <i>R/V Kaiyo Maru</i>  |          |      |                |                  |                |                      |                  |                     |                     |
| KY-08-2                | Adult    | 2008 | 25 May–9 Jun   | 4 Jun            | 21             | 2                    | 3                | 2AjM*, 1AmM*        | 3, 4 Jun            |
| KY-08-4                | Adult    | 2008 | 25–31 Aug      | 31 Aug           | 7              | 1                    | 2                | 2AjF**              | 31 Aug              |
| KY-09-2, Leg 1         | -        | 2009 | 22–30 May      | 24 May           | 10             | 0                    | 0                | -                   | -                   |
| KY-09-2, Leg 2         | Adult    | 2009 | 17–26 Jun      | 23 Jun           | 10             | 5                    | 8                | 3AjM, 4AjF, 1AmF    | 19–25 Jun           |
| <i>R/V Hokko Maru</i>  |          |      |                |                  |                |                      |                  |                     |                     |
| HK-09-04               | Adult    | 2009 | 15–22 Jun      | 23 Jun           | 14             | 1                    | 2                | 1AjM, 1AmM          | 21 Jun              |
| <i>R/V Hakuho Maru</i> |          |      |                |                  |                |                      |                  |                     |                     |
| KH-05-1, Leg 2         | Prelepto | 2005 | 31 May–12 Jun  | 7 Jun            | 64             | 6                    | 110              | <i>A. japonica</i>  | 7–10 Jun            |
| KH-05-1, Leg 4         | -        | 2005 | 30 Jun–14 Jul  | 6 Jul            | 114            | 0                    | 0                | -                   | -                   |
| KH-06-2, Leg 3         | Prelepto | 2006 | 18-27 Jul      | 25 Jul           | 78             | 3                    | 4                | <i>A. marmorata</i> | 22–23 Jul           |
| KH-06-2, Leg 5         | Prelepto | 2006 | 18-31 Aug      | 24 Aug           | 100            | 1                    | 2                | <i>A. marmorata</i> | 29 Aug              |
| KH-07-2, Leg 1         | Prelepto | 2007 | 9-18 Aug       | 13 Aug           | 63             | 10                   | 38               | <i>A. japonica</i>  | 14–18 Aug           |
| KH-07-2, Leg 1         | Prelepto | 2007 | 9-18 Aug       | 13 Aug           | 63             | 7                    | 25               | <i>A. marmorata</i> | 16–18 Aug           |
| KH-07-2, Leg 3         | -        | 2007 | 3-15 Sep       | 12 Sep           | 104            | 0                    | 0                | -                   | -                   |
| KH-08-1, Leg 1         | Prelepto | 2008 | 23 May–12 Jun  | 4 Jun            | 185            | 14                   | 249              | <i>A. japonica</i>  | 7–9 Jun             |
| KH-08-1, Leg 2         | Prelepto | 2008 | 25 Jun–10 Jul  | 3 Jul            | 147            | 2                    | 2                | <i>A. japonica</i>  | 8, 10 Jul           |
| KH-09-1                | -        | 2009 | 18–30 Apr      | 25 Apr           | 90             | 0                    | 0                | -                   | -                   |
| KH-09-2                | Prelepto | 2009 | 17–31 May      | 24 May           | 110            | 31                   | 753              | <i>A. japonica</i>  | 23–26 May           |
| KH-09-2                | Egg      | 2009 | 17–31 May      | 24 May           | 110            | 5                    | 31               | <i>A. japonica</i>  | 22–23 May           |

\*Reported by Chow *et al.*<sup>2</sup>, \*\*Kurogi *et al.*<sup>18</sup>. Catches are shown for the number of specimens of the Japanese eel, *Anguilla japonica* (Aj) and giant mottled eel, *Anguilla marmorata* (Am), and male (M) and female (F) eels.

**Supplementary Table S2. PCR primers and probes for species identification and parentage analysis using mitochondrial genes.**

| Primer           | Sequence (5'-3')              | Target                                                         | Purpose                                                           | References          |
|------------------|-------------------------------|----------------------------------------------------------------|-------------------------------------------------------------------|---------------------|
| Primer A (L2612) | GGTCC(A/T)(A/G)CCTGCCCAAGTGA  | Part of 16s rRNA gene (forward)                                | Genetic identification of adult eels                              | 55                  |
| H3059 (mod)      | CCGGTCTG(A/G)AC(C/T)AGATCACGT | Part of 16s rRNA gene (reverse)                                | Genetic identification of adult eels                              | 55 (modified H3059) |
| L15774           | ACATGAATTGGAGGAATACCAGT       | tRNAThr and tRNAPro genes and part of control region (forward) | Parentage history of preleptocephali                              | 52                  |
| H16498           | CCTGAAGTAGGAACCAGATG          | tRNAThr and tRNAPro genes and part of control region (reverse) | Parentage history of preleptocephali                              | 53                  |
| Aja16S-L3        | AATCAGTAATAAGAGGGCCCAAGC      | Part of 16s rRNA gene (forward)                                | Onboard genetic identification of eggs and preleptocephali by PCR | 34, 56              |
| Aja16S-H3        | TGTTGGGTTAACGGTTTGTGGTA       | Part of 16s rRNA gene (reverse)                                | Onboard genetic identification of eggs and preleptocephali by PCR | 34, 56              |
| Aja16S-probe     | CACATGTGTAAGTCAGAACGGACCGACC  | Part of 16s rRNA gene (fluorescent-labeled oligo probe)        | Onboard genetic identification of eggs and preleptocephali by PCR | 34, 56              |
| L1854            | AAACCTCGTACCTTTTGCAT          | Part of 16s rRNA gene (forward)                                | Genetic identification of eggs and preleptocephali                | 57                  |
| H3059            | CCGGTCTGAACTCAGATCACGT        | Part of 16s rRNA gene (reverse)                                | Genetic identification of eggs and preleptocephali                | 57                  |

### Supplementary References

55. Kurogi, H. Study on the inshore migration mechanism of *Conger myriaster* leptocephali. *Bull. Fish. Res. Agency* 24, 105–152 (2008).
56. Watanabe, S., Minegishi, Y., Yoshinaga, T., Aoyama, J. & Tsukamoto, K. A quick method for species identification of the Japanese eel *Anguilla japonica* using real-time PCR: an onboard application for use during sampling surveys. *Mar. Biotechnol.* 6, 566–574 (2004).
57. Miya, M. & Nishida, M. Molecular phylogenetic perspective on the evolution of the deep-sea fish genus *Cyclothone* (Stomiiformes: Gonostomatidae). *Ichthyol. Res.* 43, 375–389 (1996).
